# Supplementary material for: Morphological transformations in a dually thermoresponsive coil–rod–coil bioconjugate
Source: Royal Society of Chemistry journal article supplement (doi:10.1039/c2sm07025a), 2012-01-01
Supplement: c2sm07025a.pdf [file c2sm07025a.pdf]

## Morphological Transformations In A Dually Thermoresponsive Coil-Rod-Coil Bioconjugate

Ohm D. Krishna,<sup>a</sup> Kerstin T. Wiss,<sup>b</sup> Tianzhi Luo,<sup>a</sup> Darrin J. Pochan,<sup>a</sup> Patrick Theato<sup>b\*</sup> and  
Kristi L. Kiick<sup>a\*</sup>

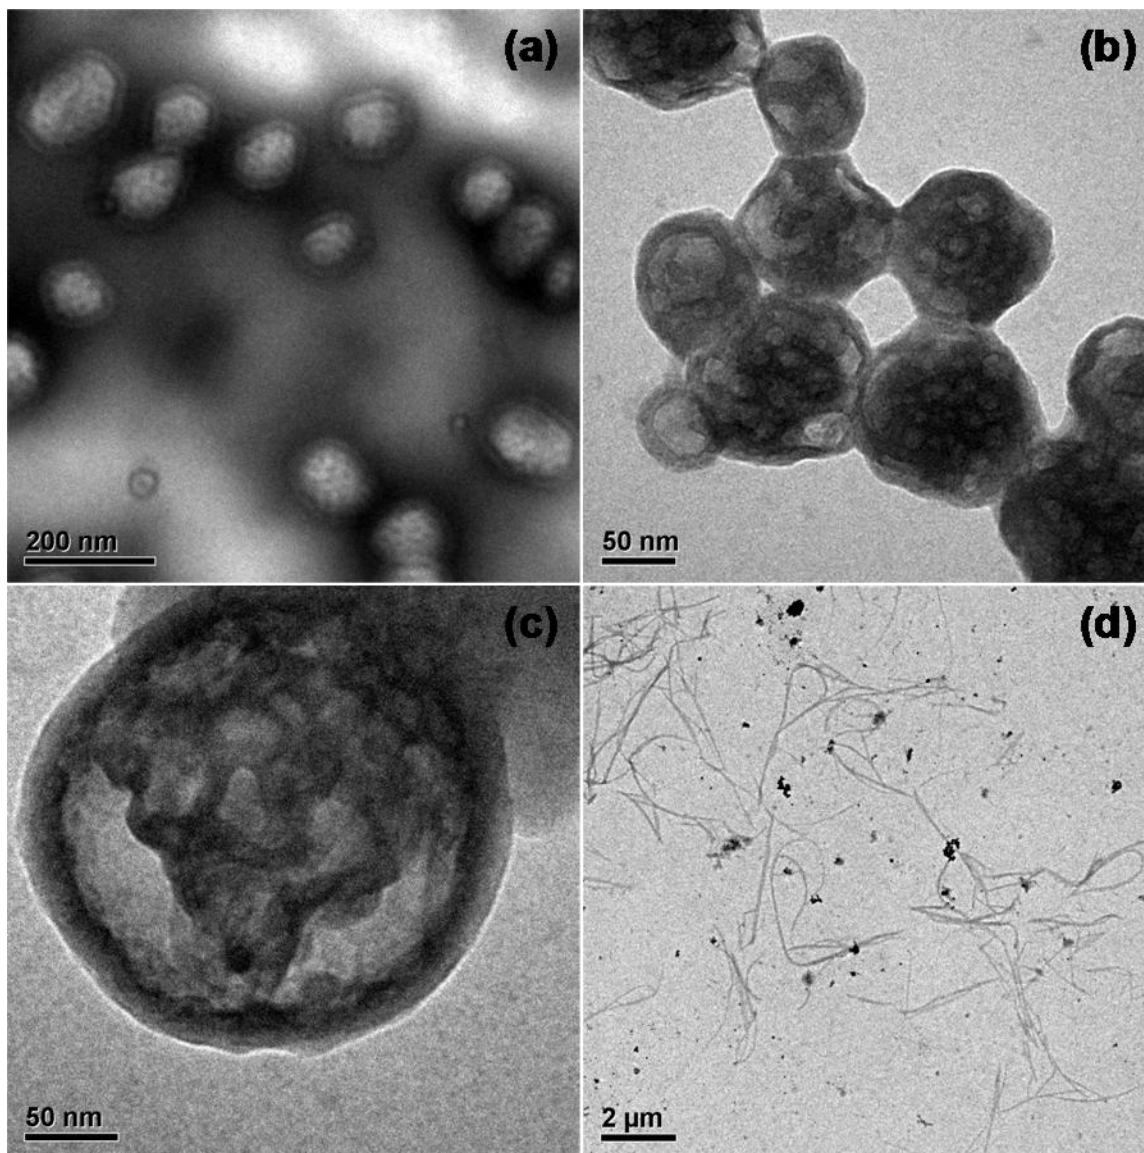

Figure S1. TEM images on the triblock hybrid at different temperatures. (a) 37 °C, stained with 1% PTA, scale bar 200 nm (b) 65 °C, unstained, scale bar 50 nm (c) 75 °C, unstained, scale bar 50 nm (d) 75 °C, unstained, scale bar 2 μm.
